# Supplementary material for: Method Validation and Establishment of Reference Intervals for an Insulin-like Growth Factor-1 Chemiluminescent Immunoassay in Cats
Source: MDPI journal article supplement (doi:10.3390/vetsci10090575), 2023-09-15
Supplement: s1 [file s1]

Table S1. Results of first and repeated 10 IGF-1 samples measured by radioimmunoassay stored >9 years at -80°C.

| Month/year of first measurement | Value (ng/ml) | Month/year of second measurement | Value (ng/ml) | Mean (ng/ml)  | SD           | CV (%)      |
|---------------------------------|---------------|----------------------------------|---------------|---------------|--------------|-------------|
| <u>11/2011</u>                  | <u>1813</u>   | <u>02/2021</u>                   | <u>1533</u>   | <u>1673</u>   | <u>140</u>   | <u>8.37</u> |
| <u>06/2011</u>                  | <u>1736</u>   | <u>02/2021</u>                   | <u>1779</u>   | <u>1757.5</u> | <u>21.5</u>  | <u>1.22</u> |
| <u>06/2011</u>                  | <u>1321</u>   | <u>02/2021</u>                   | <u>1356</u>   | <u>1338.5</u> | <u>17.5</u>  | <u>1.31</u> |
| <u>12/2011</u>                  | <u>1302</u>   | <u>02/2021</u>                   | <u>1591</u>   | <u>1446.5</u> | <u>144.5</u> | <u>9.99</u> |
| <u>01/2010</u>                  | <u>1907</u>   | <u>02/2021</u>                   | <u>2001</u>   | <u>1954</u>   | <u>47</u>    | <u>2.41</u> |
| <u>10/2011</u>                  | <u>1531</u>   | <u>02/2021</u>                   | <u>1579</u>   | <u>1555</u>   | <u>24</u>    | <u>1.54</u> |
| <u>01/2012</u>                  | <u>1442</u>   | <u>02/2021</u>                   | <u>1761</u>   | <u>1601.5</u> | <u>159.5</u> | <u>9.96</u> |
| <u>01/2010</u>                  | <u>842</u>    | <u>02/2021</u>                   | <u>857</u>    | <u>849</u>    | <u>7.5</u>   | <u>0.88</u> |
| <u>06/2012</u>                  | <u>947</u>    | <u>02/2021</u>                   | <u>852</u>    | <u>899.5</u>  | <u>47.5</u>  | <u>5.28</u> |
| <u>02/2012</u>                  | <u>896</u>    | <u>02/2021</u>                   | <u>956</u>    | <u>930.5</u>  | <u>34.5</u>  | <u>3.71</u> |

**Disclaimer/Publisher's Note:** The statements, opinions and data contained in all publications are solely those of the individual author(s) and contributor(s) and not of MDPI and/or the editor(s). MDPI and/or the editor(s) disclaim responsibility for any injury to people or property resulting from any ideas, methods, instructions or products referred to in the content.
